# Supplementary material for: Fallopia japonica Root Extract Ameliorates Ovalbumin-Induced Airway Inflammation in a CARAS Mouse Model by Modulating the IL-33/TSLP/NF-κB Signaling Pathway
Source: MDPI journal article supplement (doi:10.3390/ijms241512514), 2023-08-07
Supplement: s1 [file s1]

Supplementary material for

## ***Fallopia japonica* Root Extract Ameliorates Ovalbumin-Induced Airway Inflammation in a CARAS Mouse Model by Modulating the IL-33/TSLP/NF- $\kappa$ B Signaling Pathway**

Juan Jin <sup>1</sup>, Yan Jing Fan <sup>1,†</sup>, Thi Van Nguyen <sup>1</sup>, Zhen Nan Yu <sup>1</sup>, Chang Ho Song <sup>1,2</sup>, So-Yong Lee <sup>3,4</sup>, Hee Soon Shin <sup>3,4</sup>, Ok Hee Chai <sup>1,2,\*</sup>

<sup>1</sup> Department of Anatomy, Jeonbuk National University Medical School, Jeonju, Jeonbuk, 54896, Republic of Korea

<sup>2</sup> Institute for Medical Sciences, Jeonbuk National University Medical School, Jeonju, 54896, Jeonbuk, Korea.

<sup>3</sup> Department of Food Biotechnology, Korea University of Science and Technology, Daejeon 34113, Korea

<sup>4</sup> Department of Food Functionality Research, Korea Food Research Institute, Wanju 55365, Korea.

\* Correspondence: okchai1004@jbnu.ac.kr (O.H.Chai); Tel.: +82-6-3270-3109

† Current address: School of Medicine, Liaocheng University, Liaocheng 252000, China.

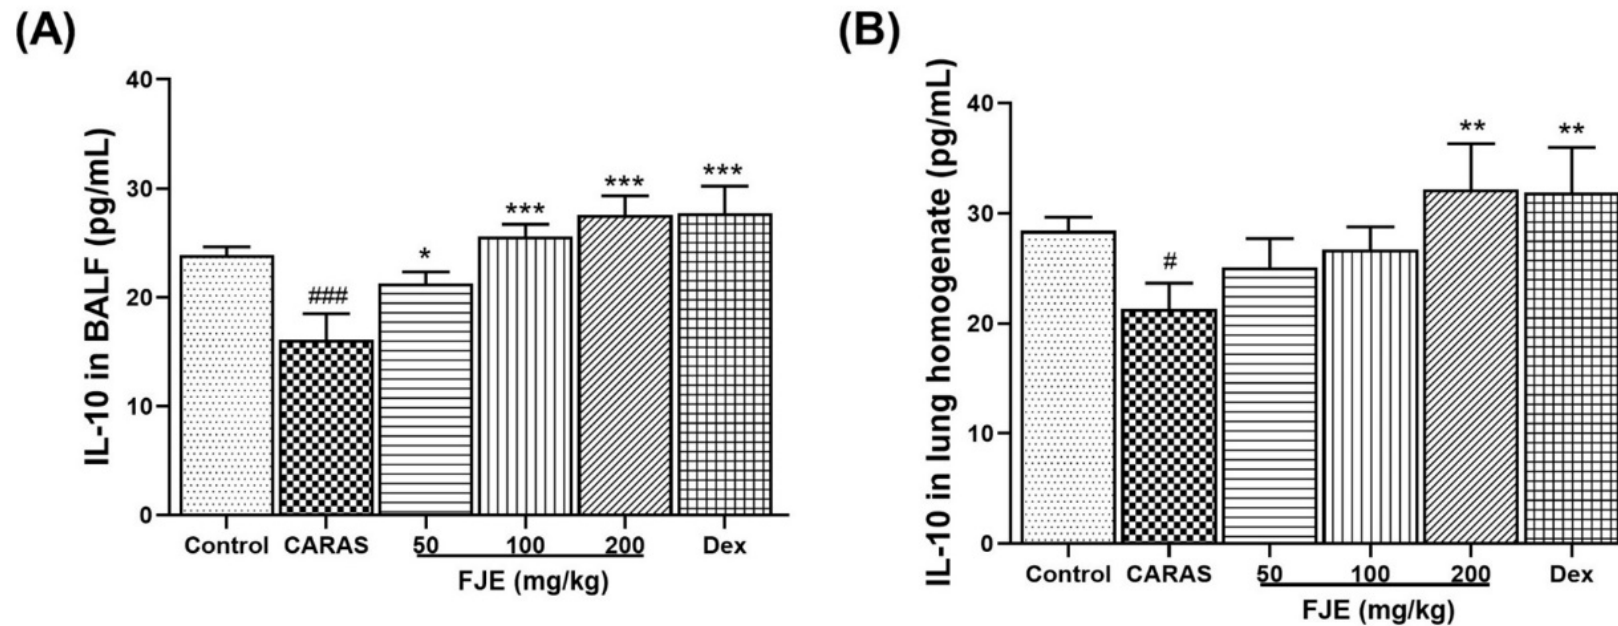

**Figure S1. Influence of FJE on IL-10 in the BALF and lung homogenate.** Mice were administered saline, Dex (1.5 mg/kg), or FJE (50, 100, 200 mg/kg) once a day for 16 days. Data represent mean  $\pm$  SEM (n=6/group). #p < 0.05, ###p < 0.001 compared with control, \*p < 0.05, \*\*p < 0.01, \*\*\*p < 0.001 vs. CARAS. Dex, Dexamethasone.

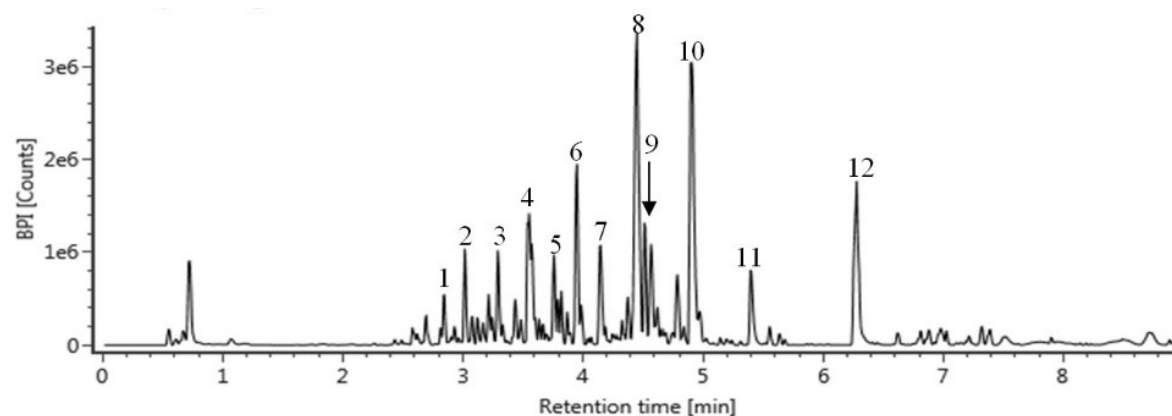

| No. | RT   | Compounds                                        | Observed mass [M-H] | Mass error | Mass fragment |
|-----|------|--------------------------------------------------|---------------------|------------|---------------|
| 1   | 2.85 | Procyanidin B                                    | 577.1343            | -0.9       | 425, 407, 287 |
| 2   | 3.02 | Cianidanol / epicatechin / catechin              | 289.0718            | 0          | 137, 125      |
| 3   | 3.3  | procyanidin B-gallate                            | 729.145             | -1.1       | 441, 407, 289 |
| 4   | 3.55 | Piceid                                           | 389.1245            | 0.3        | 227           |
| 5   | 3.76 | resveratrol 3-(6'-galloyl)-O-β-D-glucopyranoside | 541.135             | -0.1       | 313, 227, 169 |
| 6   | 3.95 | emodin-glucoside 1                               | 431.0988            | 0.4        | 269           |
| 7   | 4.15 | Vitexin sulfate / isovitexin sulfate             | 511.0553            | 0.1        | 413, 269      |
| 8   | 4.45 | emodin-glucoside 2                               | 431.0989            | 0.5        | 269           |
| 9   | 4.57 | pelargonidin 3-glucoside malonate                | 517.0984            | -0.3       | 473, 269      |
| 10  | 4.91 | marmesin / decursinol                            | 245.0817            | -0.3       | 230, 159      |
| 11  | 5.4  | sulfemodin-glucoside                             | 349.0024            | 0          | 269           |
| 12  | 6.28 | emodin                                           | 269.0455            | 0          | 241, 225      |

**Figure S2. Representative mass chromatograms of *Fallopia japonica* root extract (FJE). The mass chromatograms were obtained using UPLC-Q-TOF-MS with negative mode, a total of 12 compounds were identified. Among these resveratrol, emodin-glucoside 1, emodin glucoside 2, procyanidin, and other polyphenols potentially suppress airway inflammation.**
